# Supplementary material
Source: Springer Nature journal article supplement (https://www.springermedizin.de/resource/supplementary/12916_2010_397_MOESM2_ESM.pdf/9599858)
Supplement: MOESM2 [file 9599858]

# SWOG SO500

## SCHEMA

Registration

\*Screening blood draw prior to first dose of first-line chemotherapy

Chemotherapy may be initiated while waiting for CTC result

< 5 CTC/7.5 mL blood  
Arm A (Low Risk)

≥ 5 CTC/7.5 mL blood

\*\*Follow-up for OS and PFS  
No further blood draws

← 2<sup>nd</sup> blood draw  
at Day 22

< 5 CTC/7.5 mL

≥ 5 CTC/7.5 mL

Arm B (Moderate Risk)

Arm C (High Risk)

Randomization

\*\*\*Arm B  
Maintain Current Therapy Group

\*\*\*Arm C1  
Switch Therapy Group

Arm C2  
Switch Therapy Group
